# Supplementary material for: PriSeT: Efficient De Novo Primer Discovery
Source: bioRxiv or medRxiv preprint supplement (doi:10.1101/2020.04.06.027961), 2020-04-07
Supplement: Supplementary file [file media-1.pdf]

| Primer           | Sequence (fwd/rev)       | Tm | CG    |
|------------------|--------------------------|----|-------|
| 1426f6f9b97f501a | 3-AAACGGCTACCACATCC->    | 52 | 0.53  |
|                  | <-GGTATTTGCTACGGCTG-3    | 52 | 0.53  |
| 24555f6837b9651f | 3-TTCTTAGTTGGTGGAGTG->   | 52 | 0.44  |
|                  | <-GTCCAGACACTACGGGA-3    | 54 | 0.59  |
| 2afb9ade5ef548f  | 3-ACAGGGAGGTAGTGACA->    | 52 | 0.53  |
|                  | <-CTTGCTTTCAATCCCCTA-3   | 52 | 0.44  |
| 33c14baf2ac76276 | 3-GGCTACCACATCCAAGG->    | 54 | 0.59  |
|                  | <-CTTGCTTTCAATCCCCTA-3   | 52 | 0.44  |
| 35050c2634d666c7 | 3-GGCTACCACATCCAAGG->    | 54 | 0.588 |
|                  | <-GTGTCCCTCCATCACTGTT-3  | 58 | 0.526 |
| 38f9227a340f05e  | 3-GCCGTTCTTAGTTGGTG->    | 52 | 0.53  |
|                  | <-GTCCAGACACTACGGGA-3    | 54 | 0.59  |
| 3f32736b9d094915 | 3-TGAAACACGGACCAAGG->    | 52 | 0.53  |
|                  | <-CTCCTTTGAGACCACCT-3    | 52 | 0.53  |
| 412d47502c9c1b   | 3-TTCTTAGTTGGTGGAGTG->   | 52 | 0.44  |
|                  | <-TCTACAAGACCCGGCGT-3    | 54 | 0.59  |
| 4dbdfed2605e324  | 3-CCCTGTCCTCCTATTTTC->   | 54 | 0.5   |
|                  | <-CTACGGCTGGTTCGCTAA-3   | 54 | 0.59  |
| 57bc43fe1080644d | 3-TAGGTGCCGAGAAGATG->    | 52 | 0.53  |
|                  | <-CACTTGGACGCCTTCCT-3    | 54 | 0.59  |
| 5f5fdc94bf3f7db4 | 3-TTCTTAGTTGGTGGAGTG->   | 52 | 0.44  |
|                  | <-CCTTCAAACCTCCGTTATTG-3 | 54 | 0.42  |
| 6f74c4dbf4ceae12 | 3-TCTGCCAAGGATGTTTTTC->  | 52 | 0.44  |
|                  | <-CTACGGCTGGTTCGCTAA-3   | 54 | 0.59  |
| 7aab6403d6856205 | 3-AAATCTCAACGCATACTGC->  | 54 | 0.42  |
|                  | <-CGAAACATAGGGCGAAC-3    | 52 | 0.53  |
| 7e079b504409f8c0 | 3-ACCGTGAGGGAAAGATG->    | 52 | 0.53  |
|                  | <-ACTTTGTGCCTGGTTCC-3    | 52 | 0.53  |
| 8d14274d691d15e5 | 3-GGCTACCACATCCAAGG->    | 54 | 0.59  |
|                  | <-CATACCAGCGTTCCGAC-3    | 54 | 0.59  |
| 96c04483d9557b08 | 3-CACAGGGAGGTAGTGAC->    | 54 | 0.59  |
|                  | <-ACCTCCCGTTCAGACCA-3    | 54 | 0.59  |
| af8f7968a5ee777e | 3-GGTCTGTGATGCTCCTC->    | 54 | 0.59  |
|                  | <-CCTTACAGAGCATCCGC-3    | 54 | 0.59  |
| b099967d0f5ac180 | 3-GTGAGGATTGACAGATTG->   | 52 | 0.44  |
|                  | <-GGCAAGAATCAACCACC-3    | 52 | 0.53  |
| b7488789aaf96d7b | 3-TGGTGGGTTGCCTTGTC->    | 54 | 0.59  |
|                  | <-GTCCAGACACTACGGGA-3    | 54 | 0.59  |
| b805fd5bf8167cc7 | 3-GATACCTTCCTCAATCAAG->  | 54 | 0.42  |
|                  | <-ATCTCTGGTAACATCAGG-3   | 52 | 0.44  |
| bbcb9dc15a5fc34c | 3-GTGAACCTGCGGAAGGAT->   | 56 | 0.56  |
|                  | <-TGTGTTGGGATACGCCA-3    | 52 | 0.53  |
| c2ee8143ec040d5a | 3-AGGGAGGTAGTGACAAG->    | 52 | 0.53  |
|                  | <-AACTGCCTTCCCGTGGT-3    | 54 | 0.59  |
| cb6c82029453de6a | 3-GGCTACCACATCCAAGG->    | 54 | 0.59  |
|                  | <-TGGCAGCATCAGAGTTG-3    | 52 | 0.53  |
| cce22a01d74086cd | 3-GGCTACCACATCCAAGG->    | 54 | 0.59  |
|                  | <-CCTCATAACCAGCGTTCC-3   | 54 | 0.59  |
| d8d47dc9b873d02b | 3-GGCTACCACATCCAAGG->    | 54 | 0.59  |
|                  | <-CTTTCGTAAACGGTTCCT-3   | 52 | 0.44  |
| d90e133cfe247ad5 | 3-GGCTACCACATCTAAGG->    | 52 | 0.53  |
|                  | <-AACTGCCTTCCCGTGGT-3    | 54 | 0.59  |
| eb59a790ece1766  | 3-AGCACCTTGTGAGAAATC->   | 52 | 0.44  |
|                  | <-AACTAAGATACCCACCAC-3   | 52 | 0.44  |
| ecb3cb9fe242b24e | 3-GTGTCGCTCTTCTTCCC->    | 54 | 0.59  |
|                  | <-CGAAACATAGGGCGAAC-3    | 52 | 0.53  |
| edcd39cccec9d72a | 3-AACACGGACCAAGGAGT->    | 52 | 0.53  |
|                  | <-GGCTTTCTACCACTTGAT-3   | 52 | 0.44  |
| f83f6dae50175268 | 3-TGCGGCTTAATTTGACTC->   | 52 | 0.44  |
|                  | <-CACGTACCGGCAAGAATC-3   | 56 | 0.56  |
| fcb8901444edb4b0 | 3-ACACGGGGAAACTTACC->    | 52 | 0.53  |
|                  | <-GGCAAGAATCAACCACCT-3   | 54 | 0.5   |
